# Supplementary material for: The lncRNA MAGI2-AS3 in peripheral blood mononuclear cells: a valuable biomarker for diagnosis and prognosis prediction of breast cancer
Source: PeerJ. 2025 Jun 30;13:e19694. doi: 10.7717/peerj.19694 (PMC12273699; doi:10.7717/peerj.19694)
Supplement: Supplemental Information 1 [file peerj-13-19694-s001.xlsx]

## Sheet: Figure 4
Figure 4A
	lncRNA MAGI2-AS3
	Volunteers	Breast cancer patients
PBMCs (2-△△Ct)	0.208	0.003
	0.217	0.023
	0.219	0.038
	0.238	0.043
	0.271	0.047
	0.285	0.047
	0.322	0.051
	0.343	0.055
	0.355	0.069
	0.429	0.071
	0.433	0.072
	0.436	0.078
	0.457	0.078
	0.476	0.089
	0.476	0.093
	0.476	0.101
	0.478	0.117
	0.523	0.119
	0.532	0.133
	0.533	0.148
	0.548	0.167
	0.548	0.171
	0.548	0.173
	0.563	0.181
	0.578	0.181
	0.604	0.187
	0.61	0.19
	0.678	0.19
	0.685	0.19
	0.693	0.19
	0.698	0.193
	0.732	0.195
	0.754	0.195
	0.762	0.213
	0.775	0.214
	0.783	0.214
	0.788	0.214
	0.81	0.219
	0.81	0.238
	0.822	0.238
	0.827	0.238
	0.881	0.238
	0.881	0.238
	0.897	0.238
	0.944	0.24
	0.976	0.262
	0.977	0.262
	0.982	0.262
	0.984	0.27
	0.985	0.276
	0.988	0.279
	1	0.286
	1.012	0.294
	1.012	0.298
	1.015	0.299
	1.024	0.309
	1.024	0.31
	1.034	0.315
	1.048	0.319
	1.048	0.333
	1.048	0.343
	1.059	0.343
	1.071	0.351
	1.095	0.354
	1.117	0.355
	1.119	0.367
	1.131	0.388
	1.203	0.395
	1.213	0.399
	1.214	0.439
	1.233	0.469
	1.238	0.471
	1.262	0.477
	1.286	0.478
	1.322	0.479
	1.323	0.494
	1.333	0.532
	1.345	0.535
	1.357	0.547
	1.381	0.563
	1.429	0.573
	1.452	0.579
	1.476	0.598
	1.476	0.611
	1.5	0.621
	1.524	0.655
	1.524	0.689
	1.543	0.691
	1.544	0.711
	1.546	0.761
	1.548	0.789
	1.571	0.855
	1.628	0.795
	1.666	0.901
	1.689	0.965
	1.692	0.873
	1.711	0.998
	1.738	1.012
	1.738	1.095
	1.749	1.127
	Volunteers and Breast cancer patients: p<0.0001 (***)
Figure 4B
	lncRNA MAGI2-AS3
	DM (-)	DM (+)
PBMCs (2-△△Ct)	0.047	0.003
	0.055	0.023
	0.069	0.038
	0.072	0.051
	0.078	0.071
	0.089	0.078
	0.093	0.117
	0.213	0.148
	0.119	0.047
	0.133	0.173
	0.167	0.19
	0.171	0.043
	0.181	0.101
	0.181	0.238
	0.187
	0.19
	0.19
	0.19
	0.193
	0.195
	0.195
	0.214
	0.214
	0.214
	0.219
	0.238
	0.238
	0.238
	0.238
	0.238
	0.24
	0.262
	0.262
	0.262
	0.27
	0.276
	0.279
	0.286
	0.294
	0.298
	0.299
	0.309
	0.31
	0.315
	0.319
	0.333
	0.343
	0.343
	0.351
	0.354
	0.355
	0.367
	0.388
	0.395
	0.399
	0.439
	0.469
	0.471
	0.477
	0.478
	0.479
	0.494
	0.532
	0.535
	0.547
	0.563
	0.573
	0.579
	0.598
	0.611
	0.621
	0.655
	0.689
	0.691
	0.711
	0.761
	0.789
	0.855
	0.795
	0.901
	0.965
	0.873
	0.998
	1.012
	1.095
	1.127
	DM (-) and DM (+): p<0.0001 (***)
Figure 4C
	Time（months）	Low expression	High expression
	5	1
	9	1
	10	1
	13	1
	13	1
	14	1
	16	1
	16	1
	16	1
	18	1
	18	1
	18	1
	18	1
	20	1
	20	1
	20	1
	21	1
	21	1
	24	1
	24	1
	22	1
	24	1
	24	1
	24	1
	25	1
	30	1
	32	1
	32	1
	33	1
	33	1
	35	1
	35	1
	36	1
	40	1
	40	1
	44	1
	50	1
	50	1
	57	1
	60	0
	60	0
	60	0
	60	0
	60	0
	60	0
	60	0
	60	0
	60	0
	60	0
	60	0
	60	0
	60	0
	60	0
	60	0
	60	0
	60	0
	60	0
	60	0
	60	0
	60	0
	60	0
	60	0
	60	0
	60	0
	60	0
	60	0
	60	0
	60	0
	60	0
	10		1
	15		1
	20		1
	26		1
	26		1
	31		1
	35		1
	37		1
	42		1
	42		1
	49		1
	56		1
	60		0
	60		0
	60		0
	60		0
	60		0
	60		0
	60		0
	60		0
	60		0
	60		0
	60		0
	60		0
	60		0
	60		0
	60		0
	60		0
	60		0
	60		0
	60		0

## Sheet: Figure 5
Figure 5B
	CA15-3 (U/mL)
	Volunteers	Breast cancer patients
	3	26.4
	4	22.4
	2.35	17.3
	3.1	29.4
	1.8	32.5
	1.6	28.2
	1.65	19.3
	1.2	15.4
	0.78	32.1
	4.5	19.3
	17.3	27.1
	12.5	15.8
	10.3	17.1
	2.5	15.6
	5.6	4.3
	7.9	19.7
	13.2	8.3
	21.8	7.2
	14.5	6.5
	3.9	5.1
	7.8	3.9
	5.6	4.8
	15.3	3.1
	2.1	2.7
	3.8	4.1
	7.3	7.9
	2.31	1.2
	1.9	6.7
	6.7	19.7
	10.3	33.7
	11.5	22.7
	24.2	27.4
	19.5	29.3
	17.4	14.1
	1.31	32.5
	0.74	18.3
	1.73	15.2
	1.42	2.1
	2.28	26.3
	2.4	2.1
	1.67	13.5
	1.38	24.2
	4.7	4.8
	4.25	19.3
	2.18	15.2
	1.96	19.8
	1	2.3
	2.73	21.4
	1.94	24.5
	0.45	19.4
	1.5	12.4
	2.8	11.4
	3.9	16.7
	4.2	19.6
	5.7	26.3
	2.4	14.6
	3.5	22.5
	1.9	15.9
	6.9	12.7
	7.2	17.3
	4.5	4.9
	3.4	15.9
	7.3	9.8
	2.1	19.2
	5.2	1.2
	5.9	8.4
	7.9	28.5
	12.5	29.4
	16.8	35.4
	21.4	26.8
	12.5	19.7
	16.4	11.2
	19.7	5.3
	16.3	9.5
	14.6	13.2
	12.5	15.3
	14.9	16.4
	15.2	18.7
	14.1	11.3
	13.6	6.4
	7.6	8.5
	14.5	3.8
	13.2	33.4
	11.6	25.2
	15.3	19.8
	15.2	21.5
	17.5	11.3
	24.3	15.4
	13.2	16.7
	16.3	12.8
	13.2	8.7
	14.7	9.3
	15.1	13.6
	16.2	22.4
	19.3	5.3
	14.2	22.1
	10.6	5.6
	19.7	35.7
	18.6	32.1
	6.9	31.8
	Volunteers and Breast cancer patients: p<0.0001 (***)
Figure 5D
	AUC
	CA15-3	MAGI2-AS3	Combination
	0.6858	0.8433	0.91
	0.7518	0.8869	0.94
	0.8177	0.9305	0.969
