# Supplementary material for: The lncRNA MAGI2-AS3 in peripheral blood mononuclear cells: a valuable biomarker for diagnosis and prognosis prediction of breast cancer
Source: PeerJ. 2025 Jun 30;13:e19694. doi: 10.7717/peerj.19694 (PMC12273699; doi:10.7717/peerj.19694)
Supplement: Supplemental Information 2 [file peerj-13-19694-s002.xls]

## Sheet: Sheet1
ITEM TO CHECK	IMPORTANCE	CHECKLIST
EXPERIMENTAL DESIGN
Definition of experimental and control groups	E	Lines 116-124
Number within each group	E	Lines 116-124
Assay carried out by core lab or investigator's lab?	D	Lines 124-126
Acknowledgement of authors' contributions	D	Lines 321-333
SAMPLE
Description	E	Lines 116-124
Volume/mass of sample processed	D	Line 118-121
Microdissection or macrodissection	E	N/A
Processing procedure	E	Lines 118-124
If frozen - how and how quickly?	E	Lines 127-133
If fixed - with what, how quickly?	E	N/A
Sample storage conditions and duration (especially for FFPE samples)	E	Lines 130-133
NUCLEIC ACID EXTRACTION
Procedure and/or instrumentation	E	Lines 144-165
Name of kit and details of any modifications	E	Lines 144-165
Source of additional reagents used	D	Lines 144-165
Details of DNase or RNAse treatment	E	Lines 144-165
Contamination assessment (DNA or RNA)	E	Lines 144-165
Nucleic acid quantification	E	Lines 144-165
Instrument and method	E	Lines 144-165
Purity (A260/A280)	D	Lines 144-165
Yield	D	Lines 144-165
RNA integrity method/instrument	E	Lines 144-165
RIN/RQI or Cq of 3' and 5' transcripts	E	Lines 144-165
Electrophoresis traces	D	Lines 144-165
Inhibition testing (Cq dilutions, spike or other)	E	N/A
REVERSE TRANSCRIPTION
Complete reaction conditions	E	Lines 167-171
Amount of RNA and reaction volume	E	Lines 167-170
Priming oligonucleotide (if using GSP) and concentration	E	N/A
Reverse transcriptase and concentration	E	Lines 167-170
Temperature and time	E	Lines 170-171
Manufacturer of reagents and catalogue numbers	D	Lines 167-171
Cqs with and without RT	D*	N/A
Storage conditions of cDNA	D	Lines 171
qPCR TARGET INFORMATION
If multiplex, efficiency and LOD of each assay.	E	N/A
Sequence accession number	E	N/A
Location of amplicon	D	N/A
Amplicon length	E	N/A
In silico specificity screen (BLAST, etc)	E	N/A
Pseudogenes, retropseudogenes or other homologs?	D	N/A
Sequence alignment	D	N/A
Secondary structure analysis of amplicon	D	N/A
Location of each primer by exon or intron (if applicable)	E	N/A
What splice variants are targeted?	E	N/A
qPCR OLIGONUCLEOTIDES
Primer sequences	E	Table 1
RTPrimerDB Identification Number	D	N/A
Probe sequences	D**	N/A
Location and identity of any modifications	E	N/A
Manufacturer of oligonucleotides	D	N/A
Purification method	D	N/A
qPCR PROTOCOL
Complete reaction conditions	E	Lines 176-179
Reaction volume and amount of cDNA/DNA	E	Lines 172-175
Primer, (probe), Mg++ and dNTP concentrations	E	N/A
Polymerase identity and concentration	E	N/A
Buffer/kit identity and manufacturer	E	Lines 172-173
Exact chemical constitution of the buffer	D	N/A
Additives (SYBR Green I, DMSO, etc.)	E	Lines 173-175
Manufacturer of plates/tubes and catalog number	D	N/A
Complete thermocycling parameters	E	Lines 176-179
Reaction setup (manual/robotic)	D	N/A
Manufacturer of qPCR instrument	E	Lines 173
qPCR VALIDATION
Evidence of optimisation (from gradients)	D	N/A
Specificity (gel, sequence, melt, or digest)	E	Lines 180-207
For SYBR Green I, Cq of the NTC	E	Lines 172-179
Standard curves with slope and y-intercept	E	Lines 180-189
PCR efficiency calculated from slope	E	Lines 180-189
Confidence interval for PCR efficiency or standard error	D	N/A
r2 of standard curve	E	Lines 180-189
Linear dynamic range	E	Lines 180-189
Cq variation at lower limit	E	N/A
Confidence intervals throughout range	D	N/A
Evidence for limit of detection	E	Lines 194
If multiplex, efficiency and LOD of each assay.	E	N/A
DATA ANALYSIS
qPCR analysis program (source, version)	E	Lines 209-211
Cq method determination	E	Lines 215-216
Outlier identification and disposition	E	N/A
Results of NTCs	E	Lines 178-179
Justification of number and choice of reference genes	E	N/A
Description of normalisation method	E	Lines 180-197
Number and concordance of biological replicates	D	Lines 215-219
Number and stage (RT or qPCR) of technical replicates	E	Lines 215-219
Repeatability (intra-assay variation)	E	Lines 217-222
Reproducibility (inter-assay variation, %CV)	D	Lines 217-222
Power analysis	D	Lines 219-222
Statistical methods for result significance	E	Lines 214
Software (source, version)	E	Lines 209-211
Cq or raw data submission using RDML	D	N/A
Table 1. MIQE checklist for authors, reviewers and editors. All essential information (E) must be submitted with the manuscript. Desirable
information (D) should be submitted if available. If using primers obtained from RTPrimerDB, information on qPCR target, oligonucleotides,
protocols and validation is available from that source.
*: Assessing the absence of DNA using a no RT assay is essential when first extracting RNA. Once the sample has been validated as
RDNA-free, inclusion of a no-RT control is desirable, but no longer essential.
**: Disclosure of the probe sequence is highly desirable and strongly encouraged. However, since not all commercial pre-designed assay
vendors provide this information, it cannot be an essential requirement. Use of such assays is advised against.
